# Supplementary material for: Blood Flow Measurements Enable Optimization of Light Delivery for Personalized Photodynamic Therapy
Source: MDPI journal article supplement (doi:10.3390/cancers12061584), 2020-06-15
Supplement: s1 [file s1]

## Supplementary Materials

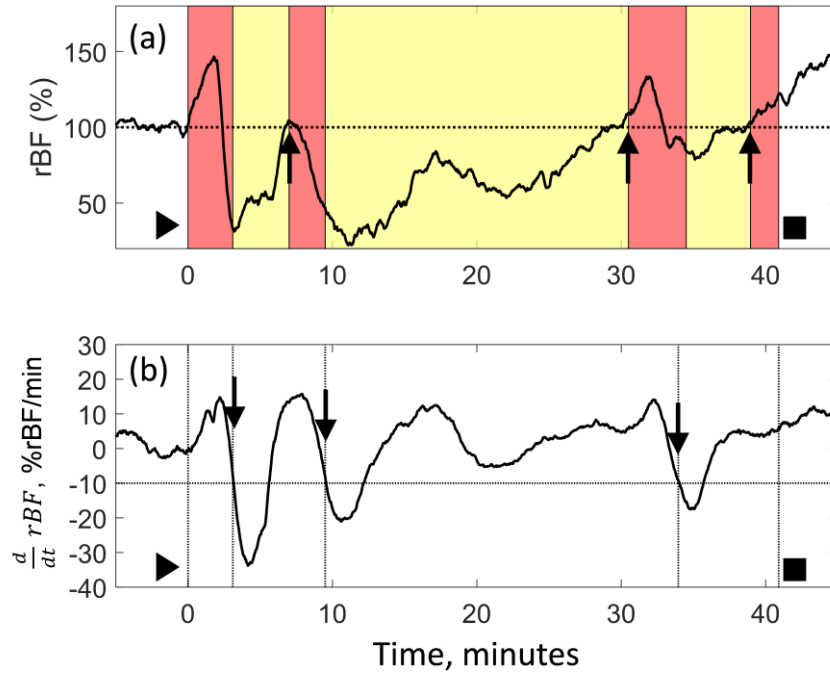

**Figure S1.** (a) Representative relative blood flow traces of RIF tumor for BFI-Irrad, and (b) the corresponding time derivative/slope of rBF computed in real-time from data in (a). Light delivery is indicated in (a) and is shaded in red or yellow for illumination at 150mWcm<sup>-2</sup> or 25mWcm<sup>-2</sup>, respectively. ► and ■ indicate the initiation and completion of light delivery, respectively. Downward pointing arrows in (b) indicate instances when rBF decreases more than 10% per minute (or rBF slope  $\leq -10\%rBFmin^{-1}$ ) and irradiance is attenuated from 150mWcm<sup>-2</sup> to 25mWcm<sup>-2</sup>. Upward pointing arrows in (a) indicate instances when rBF(t) recovers to above rBF<sub>baseline</sub>, and irradiance is increased from 25mWcm<sup>-2</sup> to 150mWcm<sup>-2</sup>.

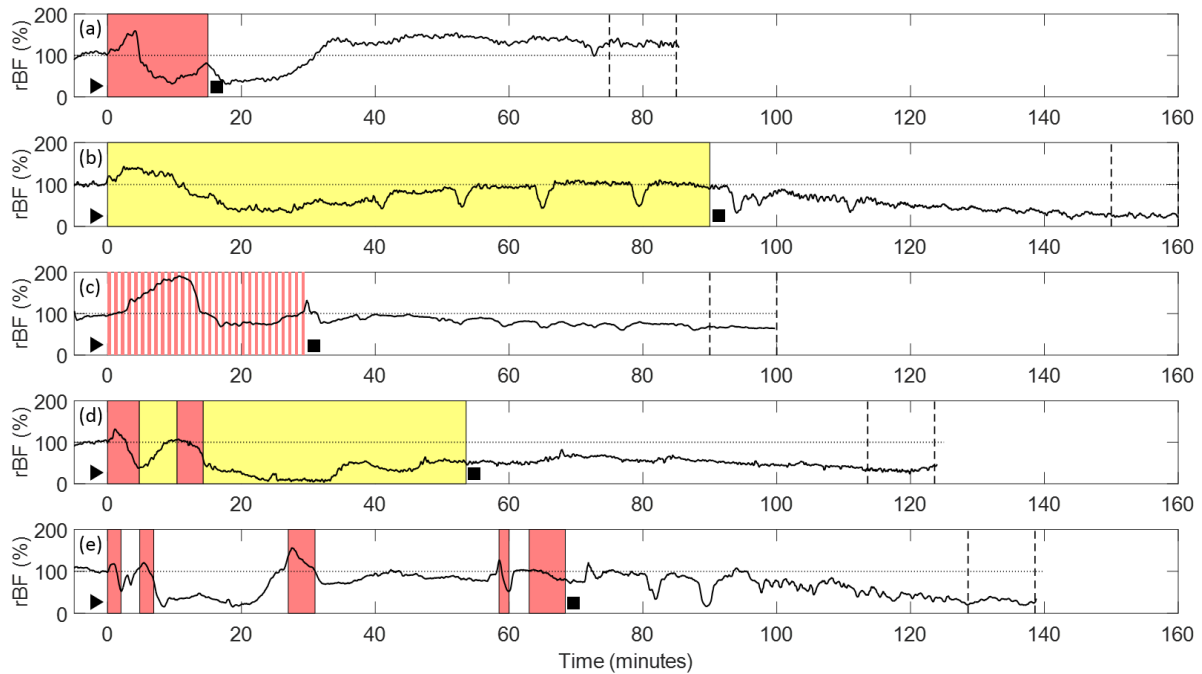

**Figure S2.** Representative blood flow traces of RIF tumors for the pre-PDT through post-PDT timeframe: (a) 150mWcm<sup>-2</sup> -continuous; (b) 25mWcm<sup>-2</sup>-continuous; (c) standard 150 mWcm<sup>-2</sup>-fractionated illumination; (d) BFI-Irrad; (e) BFI-Frac. ► and ■ indicate the initiation and conclusion of light delivery, respectively. Light delivery is shaded in red or yellow for illumination at 150mWcm<sup>-2</sup> or 25mWcm<sup>-2</sup>, respectively, with unshaded areas representing periods without illumination. Vertical dashed lines indicate 60 and 70 minutes after completion of light delivery for each treatment condition.

**Table S1.** Summary of median (95% confidence interval) percent of complete response and time-to-400 mm<sup>3</sup> for treatments of RIF tumors using each of the standard and BFI-PDT illumination schemes.

| Type of PDT         | Group                                 | Percent of complete response (%) | Time-to-400 mm <sup>3</sup> (days) |
|---------------------|---------------------------------------|----------------------------------|------------------------------------|
|                     |                                       | Median (95% CI)                  | Median (95% CI)                    |
| Standard            | 150 mWcm <sup>-2</sup> - continuous   | 0                                | 11 (6, *)                          |
|                     | 25 mWcm <sup>-2</sup> - continuous    | 30 (7, 65)                       | 19.6 (12, *)                       |
|                     | 150 mWcm <sup>-2</sup> - fractionated | 22 (2, 48)                       | 18 (12, *)                         |
| Blood-flow informed | BFI-Irrad                             | 40 (12, 74.5)                    | 29 (18, *)                         |
|                     | BFI-Frac                              | 56 (18, 91)                      | 39 (18, *)                         |

\*Unable to estimate due to insufficient events. Response rates align with Kaplan Meier curves of Figure 5 (which incorporate censoring for fractionated treatments that produced morbidity).

**Table S2.** Summary of median (95% confidence interval) percent of complete response and time-to-400 mm<sup>3</sup> for treatments of AB12 tumors using 150 mWcm<sup>-2</sup>-continuous, 25 mWcm<sup>-2</sup>-continuous and BFI-Irrad illumination schemes.

| Group                               | Percent of complete response (%) | Time-to-400 mm <sup>3</sup> (days) |
|-------------------------------------|----------------------------------|------------------------------------|
|                                     | Median (95% CI)                  | Median (95% CI)                    |
| 150 mWcm <sup>-2</sup> - continuous | 33 (7, 71)                       | 20 (6, *)                          |
| 25 mWcm <sup>-2</sup> - continuous  | 89 (52, 100)                     | >90 (*, *)                         |
| BFI-Irrad                           | 100 (69, 100)                    | >90 (*, *)                         |

\*Unable to estimate due to insufficient events.
